# Supplementary material for: Cytokinin signaling promotes root secondary growth and bud formation in Panax ginseng
Source: PubMed Central journal article supplement — J Ginseng Res. 2023 Nov 10;48(2):220–8. doi: 10.1016/j.jgr.2023.11.002 (PMC10919999; doi:10.1016/j.jgr.2023.11.002), 2023-11-10
Supplement: mmc1.pdf [file mmc1.pdf]

## A Response to ABA

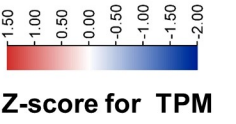

Z-score for TPM

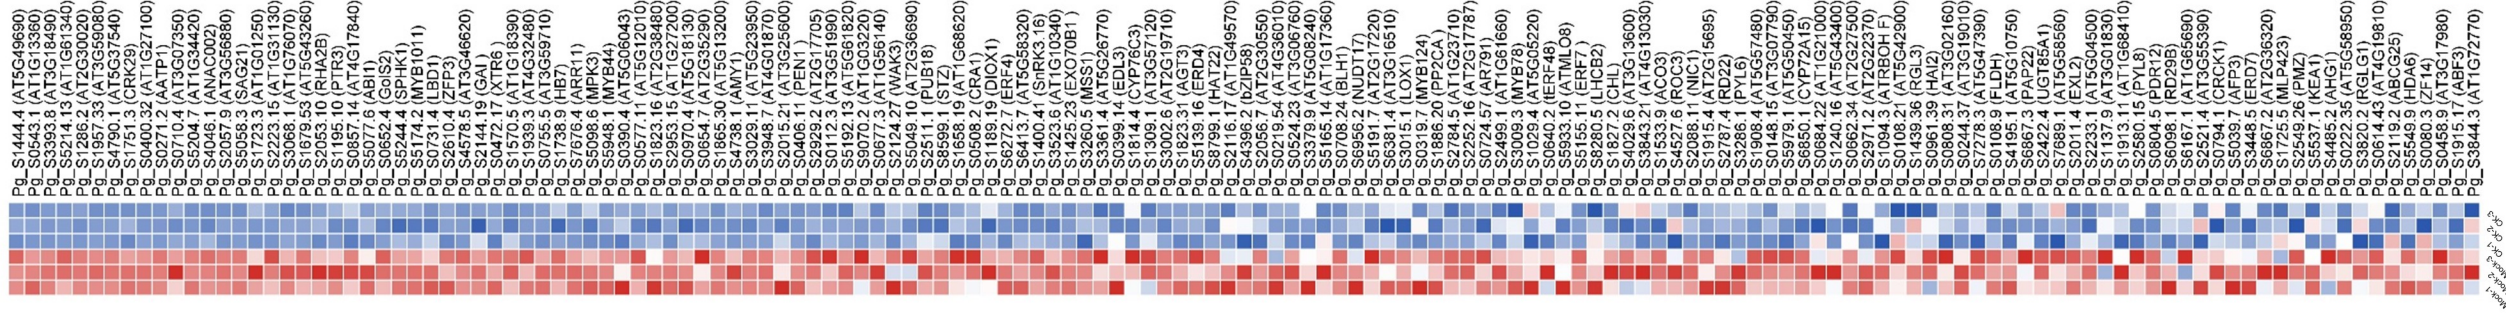

## B Response to Ethylene

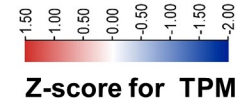

Z-score for TPM

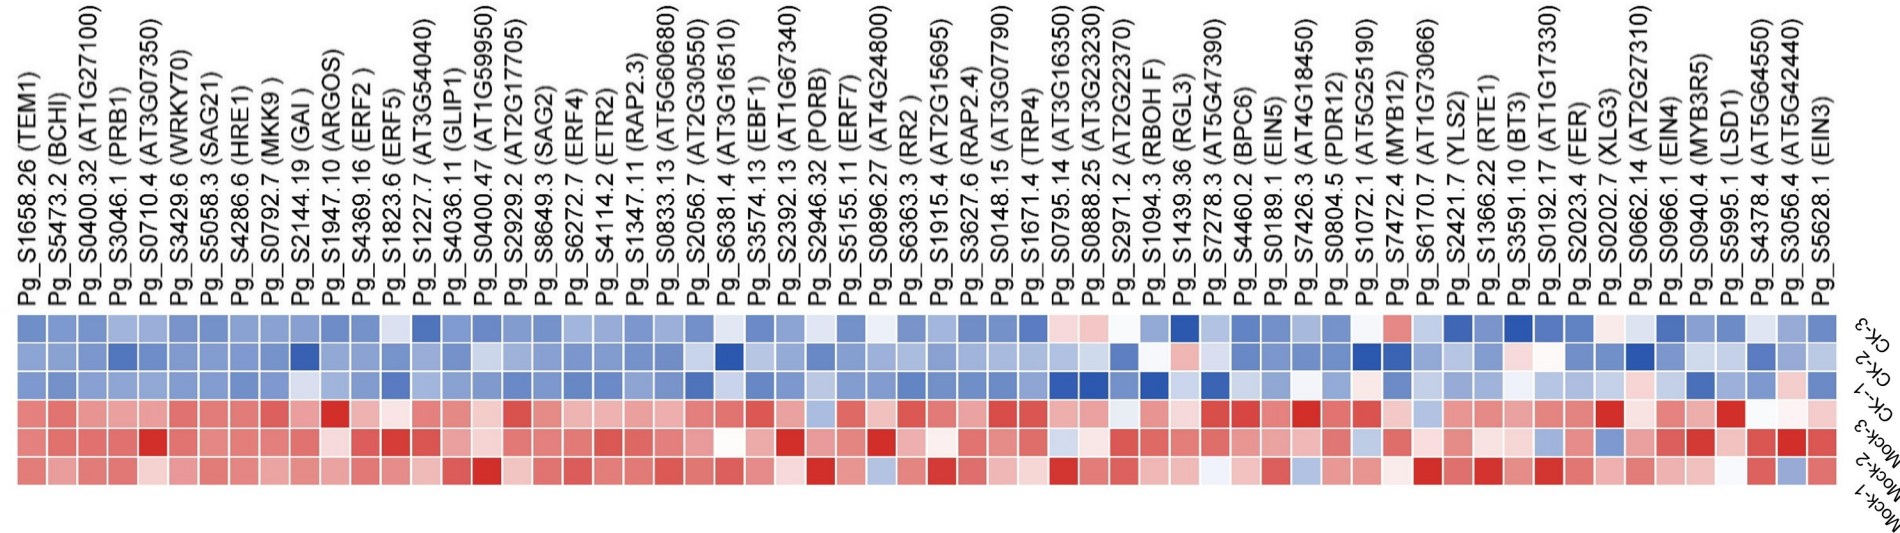

**Supplementary figure 1.** Expression heatmap of the leading-edge subset genes of (A) Response to ABA and (B) Response to Ethylene presented in Fig. 3C.

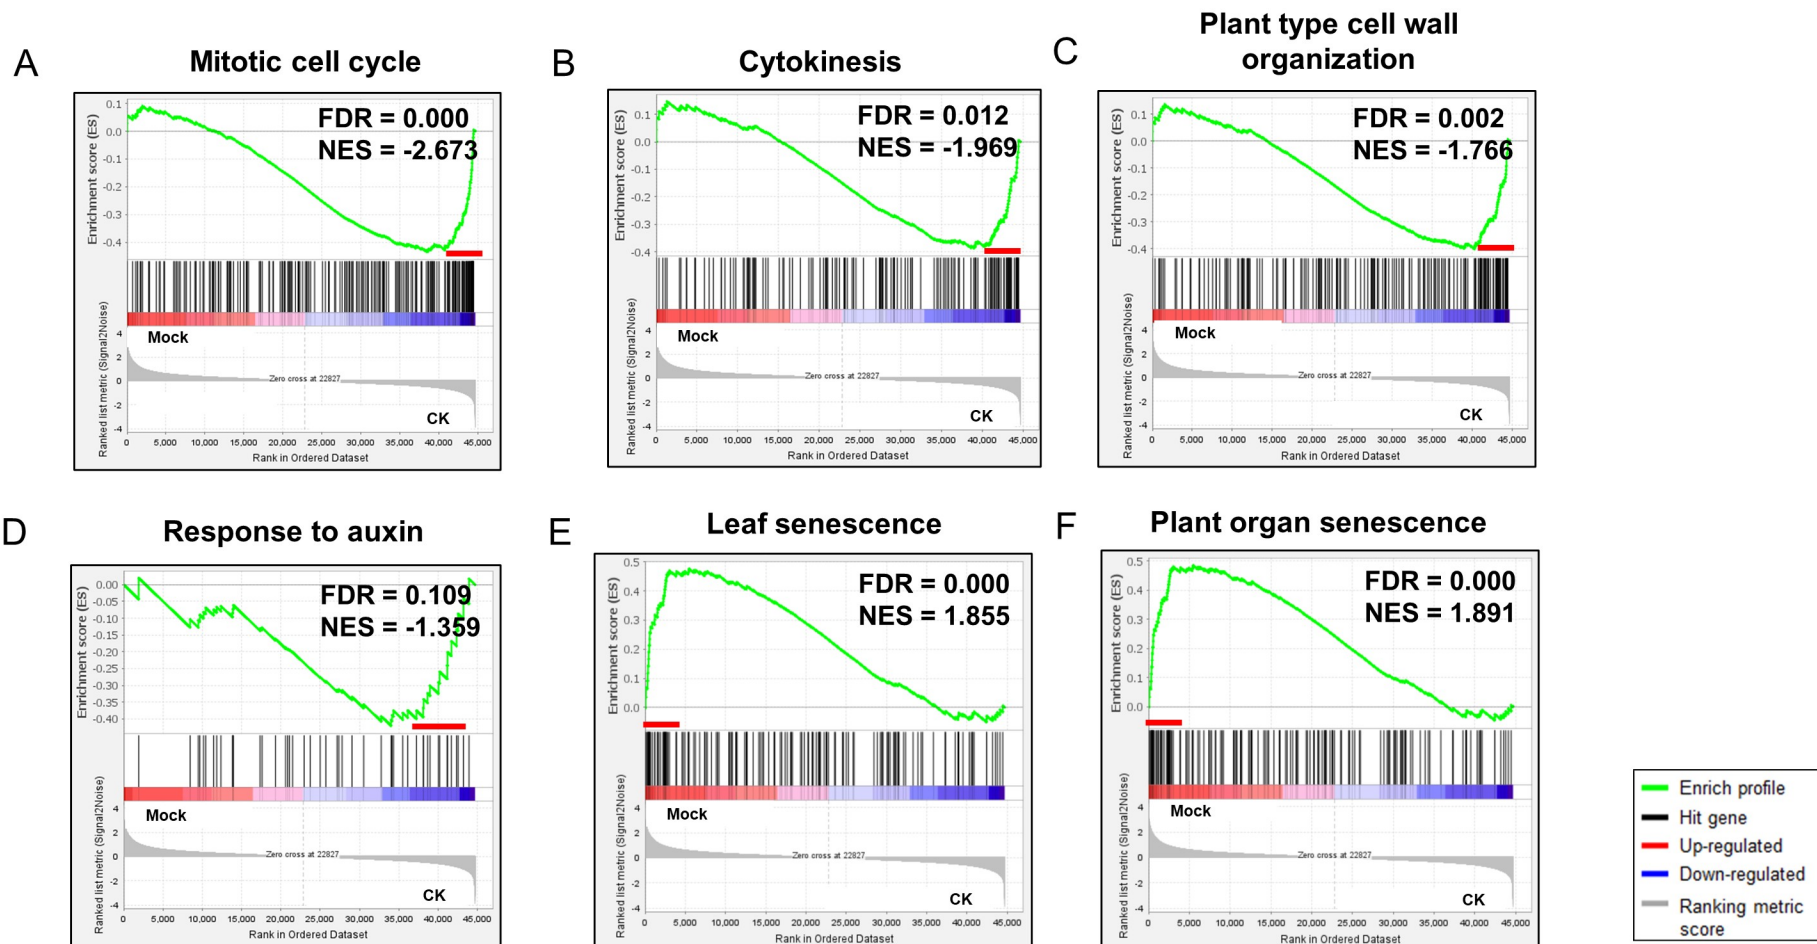

**Supplementary figure 2.** Enrichment plot for Mitotic cell cycle (FDR = 0.000, NES = -2.6730092), cytokinesis (FDR = 0.012770083, NES = -1.96904), Plant type cell wall organization (FDR = 0.0022396417, NES = -1.7666447), Response to auxin (FDR = 0.109900534, NES = -1.3593768), Leaf senescence (FDR = 0.00014285714, NES = 1.8558527) and Plant organ senescence (FDR = 0.000, NES = 1.8910872) GSEA. In the plot, the red line indicates a leading-edge subset of the enriched gene set group leading to enrichment scores concerning expression changes.

## A Cell cycle

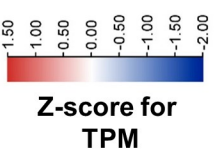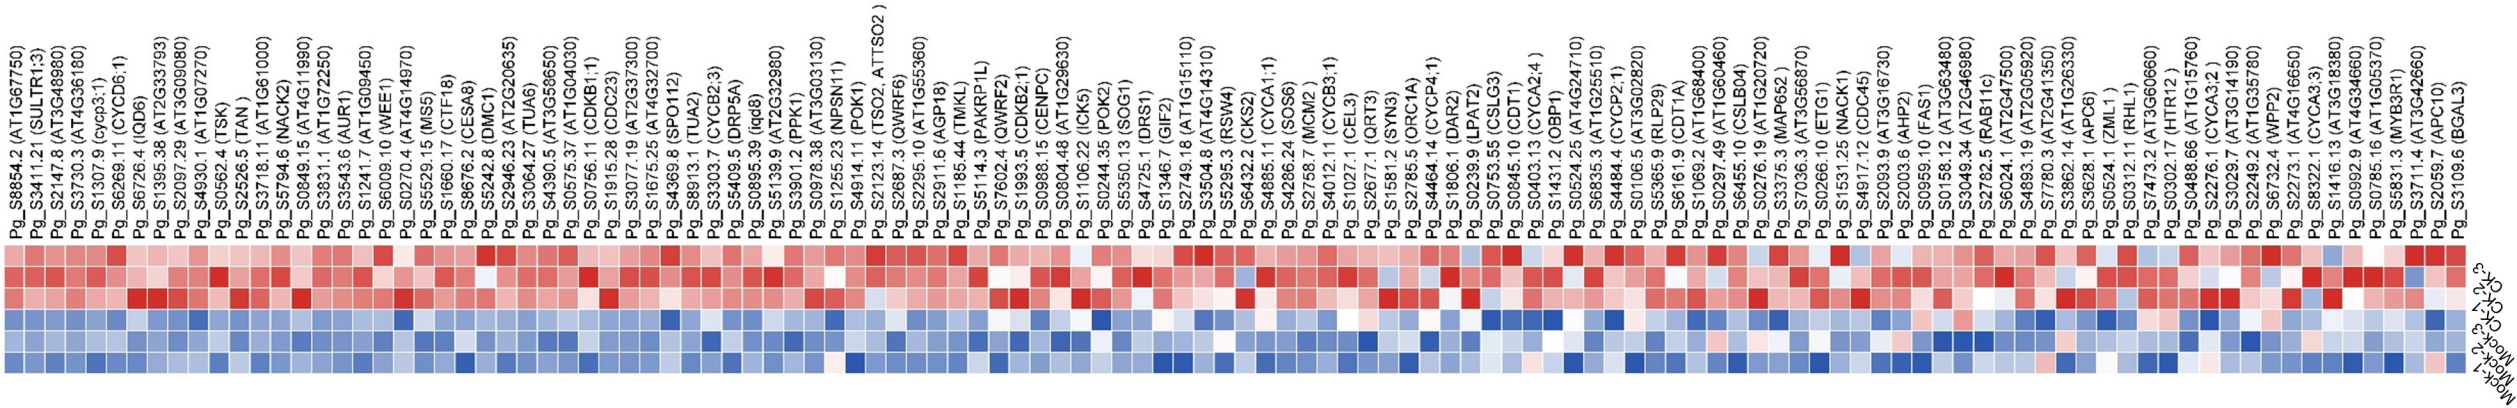

## B Cell division

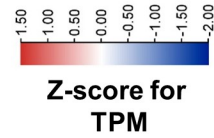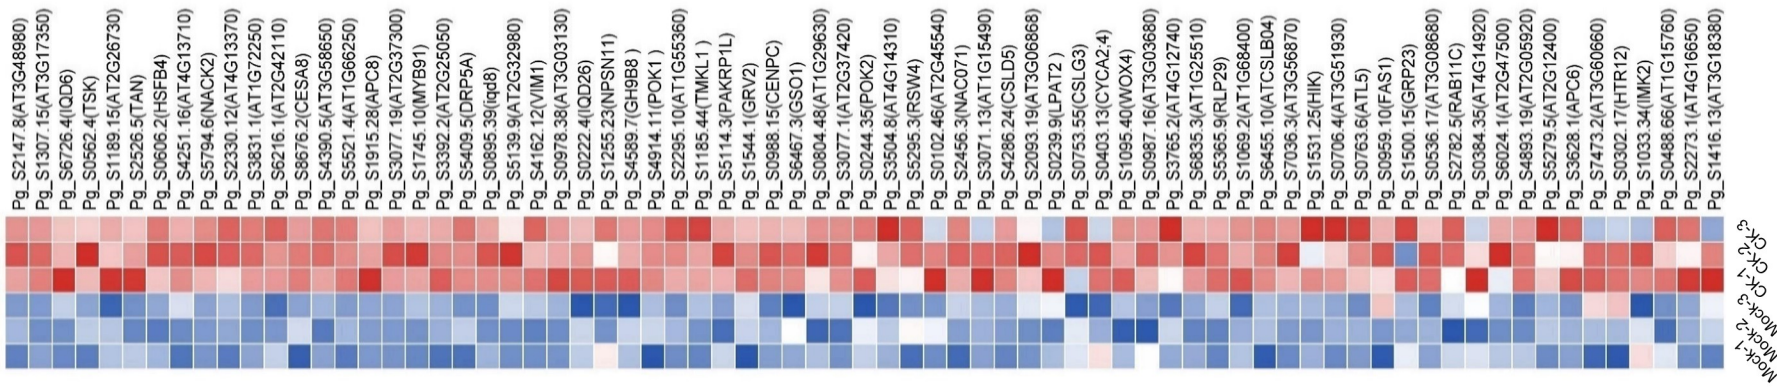

Supplementary figure 3. Expression heatmap of the leading-edge subset genes of (A) cell cycle and (B) cell division presented in Fig. 3D.

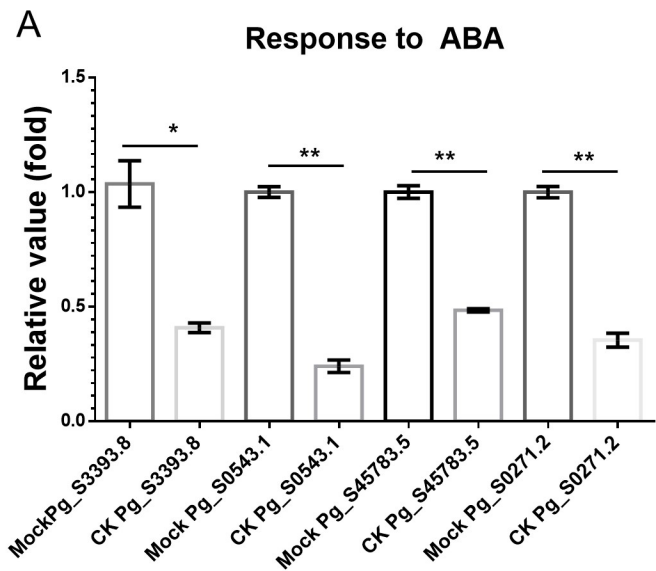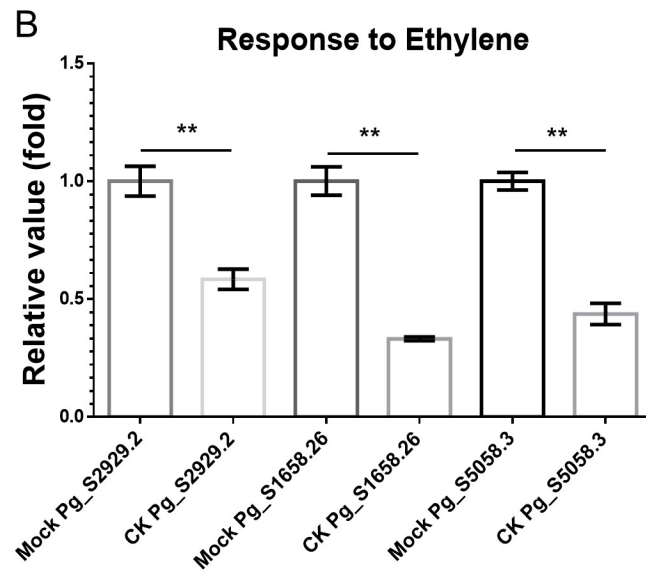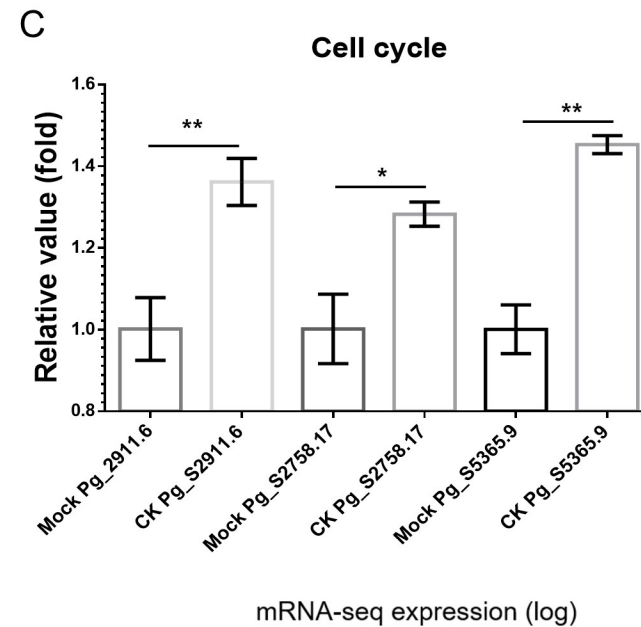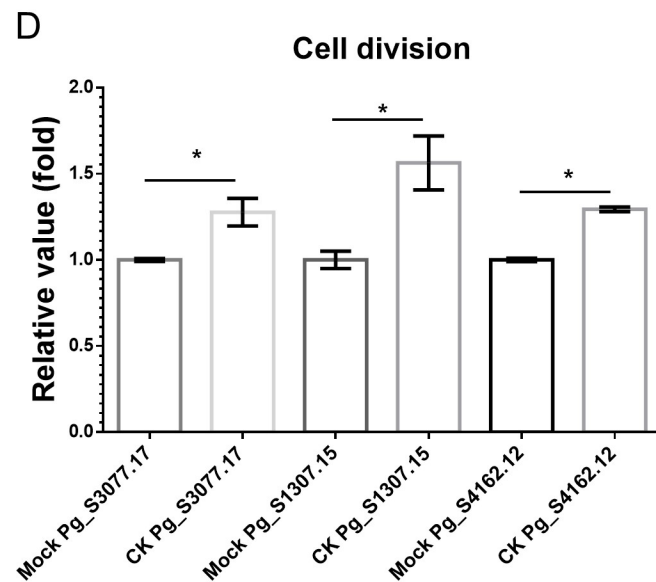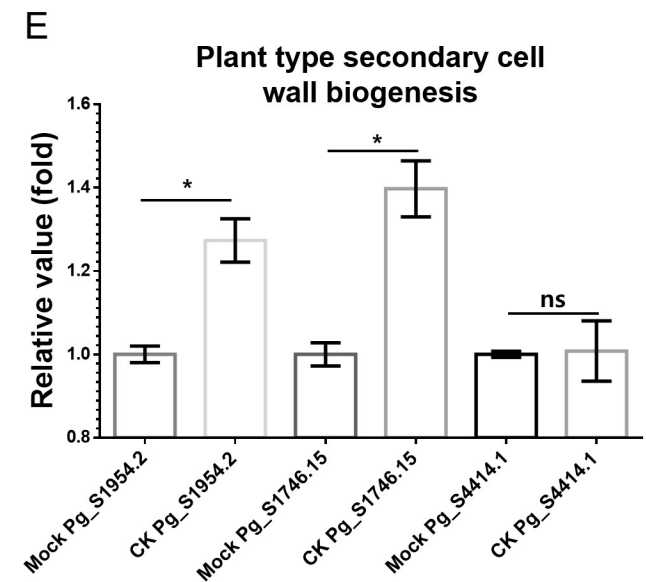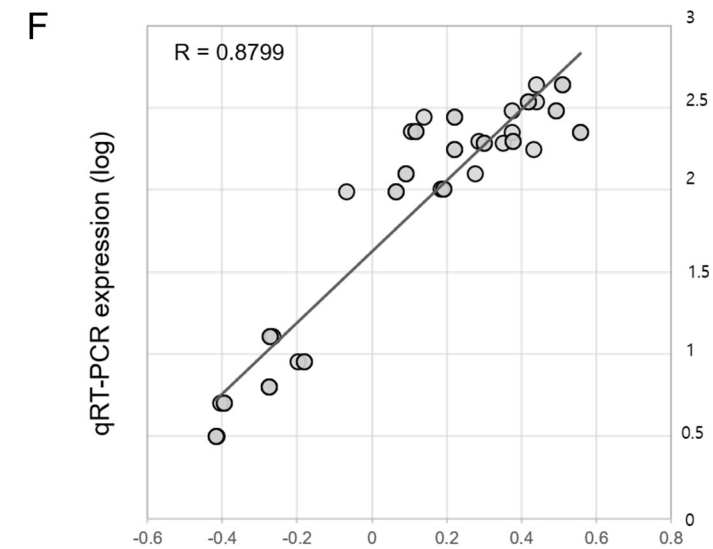

**Supplementary figure 4.** Validation of the transcripts level of GSEA transcriptome data by qRT-PCR. (A) The expression level of Response to ABA related genes. (B) The expression level of Response to Ethylene related genes. (C) The expression level of Cell cycle related genes. (D) The expression level of Cell division related genes. (E) The expression level of Plant type secondary cell wall biogenesis related genes. The expression level was measured by quantitative real-time reverse transcription-polymerase chain reaction (qRT-PCR). *PgACT1* was used as an internal control. Error bars indicate SEM (\*P < 0.05, \*\*P < 0.01 Student's t-test, n.s., no significance). (F) Analysis between qRT-PCR expression and mRNA-seq data using linear regression. The TPM which is TMM-normalized of target genes divided by that of *PgACT1*, as an internal control, is indicated in the x axis, while relative expression levels of each gene were determined by  $2^{-\Delta\Delta CT}$  method, as indicated in the y axis.

**A**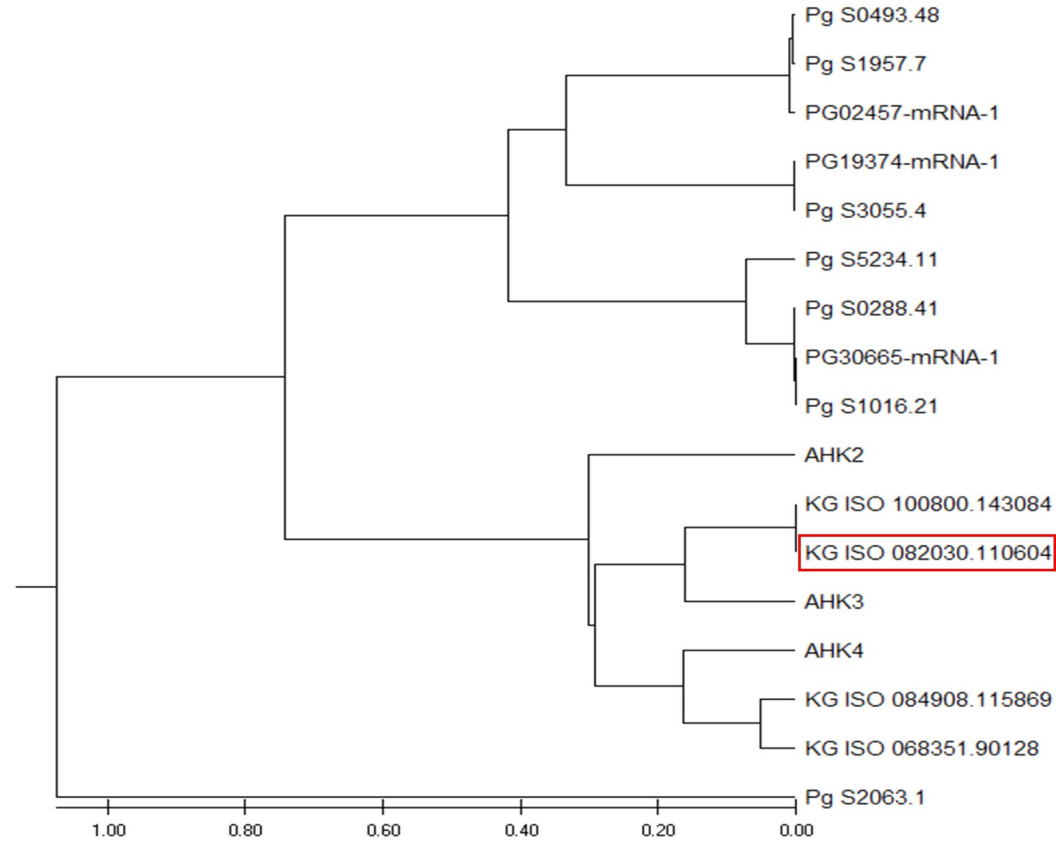**B**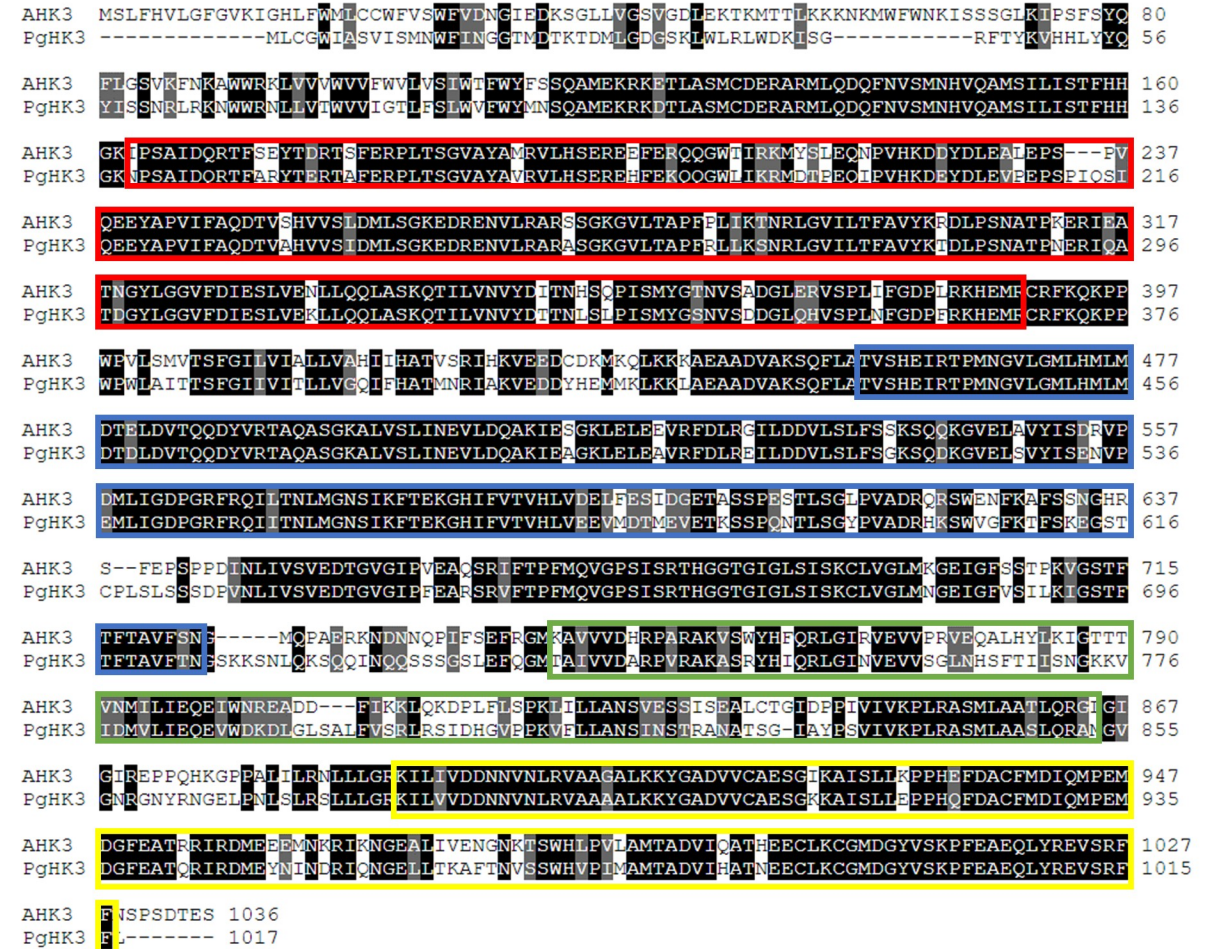

**Supplementary figure 5.** Identification of putative CK receptor genes in *P. ginseng* (A) Phylogenetic trees of AHK2, AHK3, AHK4 and putative PgHK proteins were analyzed with MEGA 7 program. Tree scale bar: 0.1. (B) CHASE, Histidine kinase and Response regulatory 2 domain were conserved in PgHK3. Conserved domains are CHASE domain in red, Histidine kinase domain in blue, Response regulatory 1 domain in green, Response regulatory 2 in yellow. Identical amino acids were shaded in black, and similar amino acids were shaded in gray.

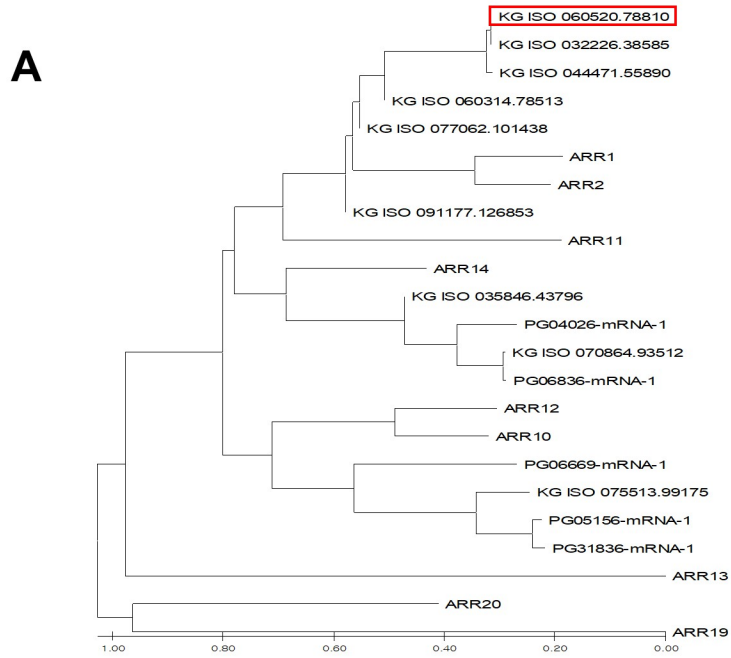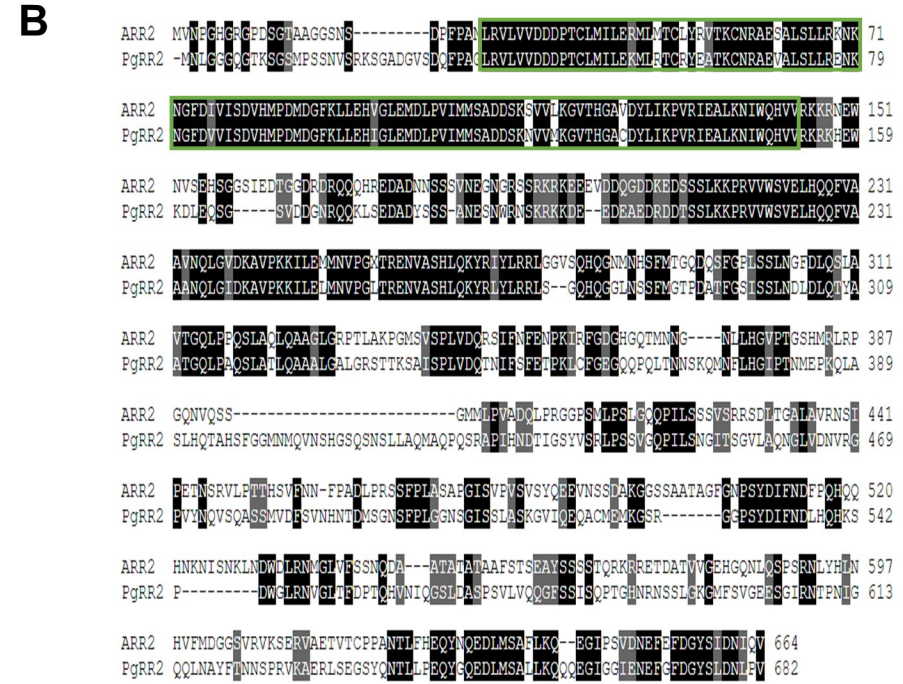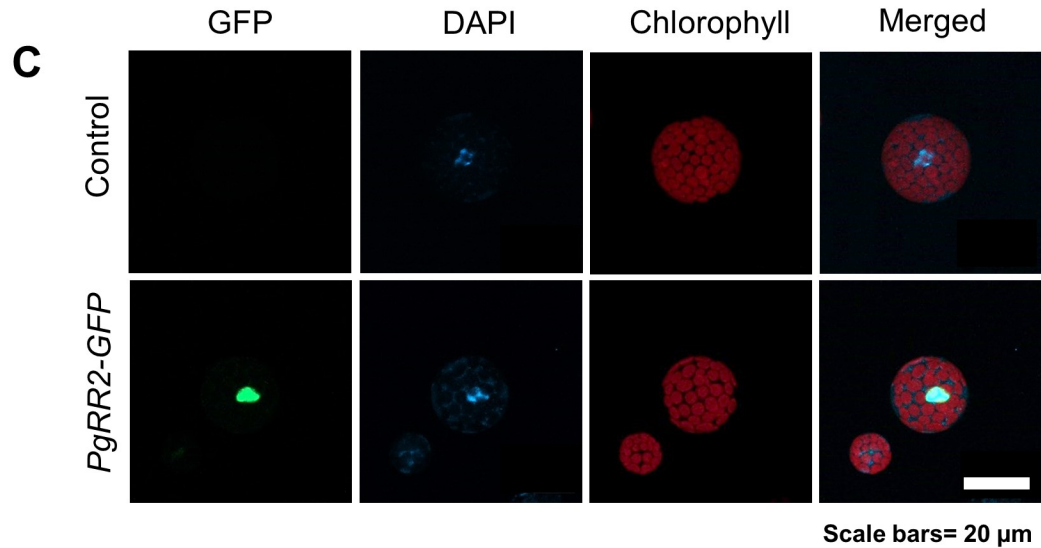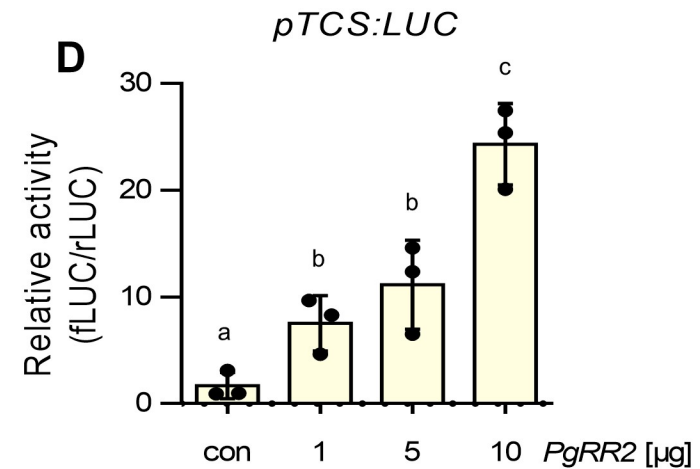

**Supplementary figure 6.** Identification of putative type-B response regulator genes in *P. ginseng* genome. (A) Phylogenetic trees of type-B ARRs and putative PgRRs were analyzed with MEGA 7 program. KG ISO 060520.78810 was cloned as a *PgRR2*. (B) Response regulatory domains were conserved in *PgRR2*. Response regulatory 1 domain is conserved (green box). Identical amino acids were shaded in black, and similar amino acids were shaded in gray. (C) *PgRR2* is localized at the nucleus. Scale bar = 20 $\mu$ m. (D) Measurement of transcriptional level of *proTCS::LUC* by *PgRR* concentration (1 – 10  $\mu$ g). Error bars represent standard error (n=3). Different lowercase letters indicate statistically significant differences  $P < 0.05$ ; one-way ANOVA, followed by Tukey's multiple range test.



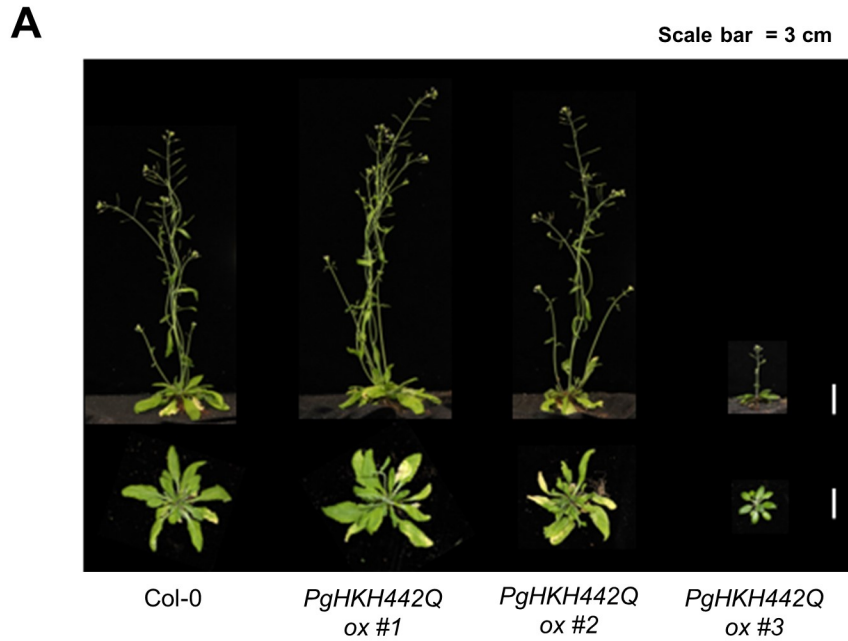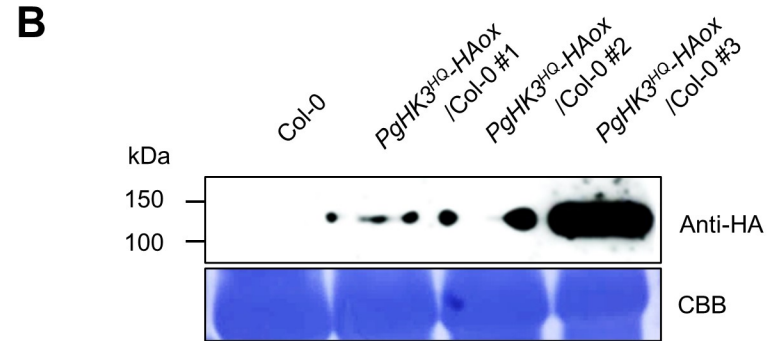

**Supplementary figure 7.** (A) Phenotype of 5-week-old *PgHK3H442Q* overexpressing lines in Col-0 background. Scale bar = 3. (B) The protein expression levels of *PgHK3-H442Q* overexpressing lines. Proteins were detected with an anti-HA antibody.
